# Supplementary material for: Probiotics reshape the coral microbiome in situ without affecting the surrounding environment
Source: Research Square preprint supplement (doi:10.21203/rs.3.rs-3414265/v1), 2023-10-31
Supplement: Supplementary file 1 [file 4342e2abb13c3612a1908837.xlsx]

## Sheet: Table S1
Table S1. Summary of the BMC traits results for the six selected BMCs for the probiotic consortium. (-) indicates a negative result, (+) indicates positive result. For the catalase test, results are denoted with (+), (++), and (+++) from less to high production of bubbles, as a proxy of the catalase reaction.
Strain	BMC ID	Coral-Host	Antagonism against Vibrio coralliilyticus	Catalase	Siderophores production	Urease	Phosphate assimilation
30H	Pseudoalteromonas galatheae	Pocillopora verrucosa	(-)	(+)	(-)	(-)	(-)
33H	Pseudoalteromonas galatheae	Pocillopora verrucosa	(-)	(+)	(-)	(-)	(-)
65H	Cobetia amphilecti	Pocillopora verrucosa	(-)	(+++)	(-)	(-)	(+)
81H	Cobetia amphilecti	Pocillopora verrucosa	(-)	(+++)	(-)	(-)	(+)
SAT10	Halomonas sp.	Stylophora pistillata Clade IV	(-)	(+++)	(+)	(-)	(-)
SAA19	Sutcliffiella sp.	Galaxea fascicularis	(-)	(+)	(+)	(-)	(-)

## Sheet: Table S2
Table S2. Normality test and pairwise comparisons between treatments (Control and Probiotic) of the top 10 most abundant families in T3
Normality test Shapiro Wilks	Burkholderiaceae	Endozoicomonadaceae	Lachnospiraceae	Phycisphaeraceae	Prevotellaceae	Rhodobacteraceae	Rikenellaceae	Simkaniaceae	Spirochaetaceae	Unclassified Alphaproteobacteria
p-value	1.851e-10	0.01963	2.616e-08	1.461e-07	2.255e-09	1.392e-09	3.533e-09	4.929e-06	9.172e-07	7.263e-08
W	0.32762	0.91238	0.54874	0.61261	0.44659	0.42485	0.46633	0.72515	0.67424	0.5874
Interpretation	Not normal	Not normal	Not normal	Not normal	Not normal	Not normal	Not normal	Not normal	Not normal	Not normal
Homogeneity of variances Levene test
Pr(>F)	0.5717	0.03718	0.02292	0.1128	0.04166	0.3982	0.04562	0.9164	0.717	0.8242
F-value	0.3278	4.8048	5.8191	2.6866	4.5742	0.737	4.3918	0.0112	0.1342	0.0503
Interpretation	Homogeneity	Not homogeneity	Not homogeneity	Homogeneity	Not homogeneity	Homogeneity	Not homogeneity	Homogeneity	Homogeneity	Homogeneity
Wilcox test for pairwise comparisons for top 10 families of P. verrucosa in T3
Family	p-value
Burkholderiaceae	0.78
Endozoicomonadaceae	0.0068
Lachnospiraceae	1.8e-05
Phycisphaeraceae	0.5
Prevotellaceae	3.1e-05
Rhodobacteraceae	0.00042
Rikenellaceae	0.00014
Simkaniaceae	0.077
Unclassified Alphaproteobacteria	0.15
Spirochaetaceae	0.68

## Sheet: Table S3
Table S3. Top 20 most significant differentially abundant ASVs (enriched and decreased) in probiotic treated corals, in comparison to the control, respectively. The ANCOMBC-2 results and the associated taxonomy of the ASVs are given.
	Decreased (neg) or enriched (pos)	taxon	new_lab	W statistic	Log Fold Change treatment	q-val treatment	Differentially abundant	Domain	Phylum	Class	Order	Family	Genus
1	Decreased	ASV_3871	ASV_3871 Anaerobacter	-6.29537	-0.330703	6.36645e-08	TRUE	Bacteria	Firmicutes	Clostridia	Clostridiales	Clostridiaceae	Anaerobacter
2	Decreased	ASV_33865	ASV_33865 Catenococcus	-8.18356	-0.398387	3.81411e-13	TRUE	Bacteria	Proteobacteria	Gammaproteobacteria	Enterobacterales	Vibrionaceae	Catenococcus
3	Decreased	ASV_15153	ASV_15153 Endozoicomonas	-7.50706	-0.4212	5.02146e-11	TRUE	Bacteria	Proteobacteria	Gammaproteobacteria	Pseudomonadales	Endozoicomonadaceae	Endozoicomonas
4	Decreased	ASV_29809	ASV_29809 Endozoicomonas	-6.59289	-0.374648	1.79091e-08	TRUE	Bacteria	Proteobacteria	Gammaproteobacteria	Pseudomonadales	Endozoicomonadaceae	Endozoicomonas
5	Decreased	ASV_535	ASV_535 Endozoicomonas	-6.47028	-0.59474	3.38458e-08	TRUE	Bacteria	Proteobacteria	Gammaproteobacteria	Pseudomonadales	Endozoicomonadaceae	Endozoicomonas
6	Decreased	ASV_520	ASV_520 Endozoicomonas	-6.44588	-0.657432	3.67073e-08	TRUE	Bacteria	Proteobacteria	Gammaproteobacteria	Pseudomonadales	Endozoicomonadaceae	Endozoicomonas
7	Decreased	ASV_37509	ASV_37509 MND1	-6.29537	-0.330703	6.36645e-08	TRUE	Bacteria	Proteobacteria	Gammaproteobacteria	Burkholderiales	Nitrosomonadaceae	MND1
8	Decreased	ASV_49869	ASV_49869 MND1	-6.29537	-0.330703	6.36645e-08	TRUE	Bacteria	Proteobacteria	Gammaproteobacteria	Burkholderiales	Nitrosomonadaceae	MND1
9	Decreased	ASV_19815	ASV_19815 Nitrospira	-6.59289	-0.374648	1.79091e-08	TRUE	Bacteria	Nitrospirota	Nitrospiria	Nitrospirales	Nitrospiraceae	Nitrospira
10	Decreased	ASV_45942	ASV_45942 Pedobacter	-8.18356	-0.398387	3.81411e-13	TRUE	Bacteria	Bacteroidota	Bacteroidia	Sphingobacteriales	Sphingobacteriaceae	Pedobacter
11	Decreased	ASV_29709	ASV_29709 Povalibacter	-6.29537	-0.330703	6.36645e-08	TRUE	Bacteria	Proteobacteria	Gammaproteobacteria	Steroidobacterales	Steroidobacteraceae	Povalibacter
12	Decreased	ASV_1208	ASV_1208 Tropicimonas	-6.74998	-0.453875	1.02324e-08	TRUE	Bacteria	Proteobacteria	Alphaproteobacteria	Rhodobacterales	Rhodobacteraceae	Tropicimonas
13	Decreased	ASV_5717	ASV_5717 Unclassified	-8.4311	-0.404336	1.42177e-13	TRUE	Bacteria	Unclassified	Unclassified	Unclassified	Unclassified	Unclassified
14	Decreased	ASV_33	ASV_33 Unclassified	-8.14017	-0.564852	4.09706e-13	TRUE	Bacteria	Proteobacteria	Alphaproteobacteria	Puniceispirillales	SAR116 clade	Unclassified
15	Decreased	ASV_12610	ASV_12610 Unclassified	-6.59289	-0.374648	1.79091e-08	TRUE	Bacteria	Unclassified	Unclassified	Unclassified	Unclassified	Unclassified
16	Decreased	ASV_45776	ASV_45776 Unclassified	-6.59289	-0.374648	1.79091e-08	TRUE	Bacteria	Gemmatimonadota	Gemmatimonadetes	Gemmatimonadales	Gemmatimonadaceae	Unclassified
17	Decreased	ASV_15608	ASV_15608 Unclassified	-6.4775	-0.409657	3.38458e-08	TRUE	Bacteria	Proteobacteria	Gammaproteobacteria	Pseudomonadales	P13-46	Unclassified
18	Decreased	ASV_407	ASV_407 Unclassified	-6.29537	-0.330703	6.36645e-08	TRUE	Bacteria	Proteobacteria	Alphaproteobacteria	Puniceispirillales	SAR116 clade	Unclassified
19	Decreased	ASV_29808	ASV_29808 Unclassified	-6.29537	-0.330703	6.36645e-08	TRUE	Bacteria	Proteobacteria	Gammaproteobacteria	Pseudomonadales	Unclassified	Unclassified
20	Decreased	ASV_50372	ASV_50372 Unclassified	-6.29537	-0.330703	6.36645e-08	TRUE	Bacteria	Actinobacteriota	MB-A2-108	Unclassified	Unclassified	Unclassified
21	Enriched	ASV_1007	ASV_1007 Alcaligenes	4.77158	1.13516	8.33997e-05	TRUE	Bacteria	Proteobacteria	Gammaproteobacteria	Burkholderiales	Alcaligenaceae	Alcaligenes
22	Enriched	ASV_353	ASV_353 Christensenellaceae R-7 group	5.60293	2.23363	1.71579e-06	TRUE	Bacteria	Firmicutes	Clostridia	Christensenellales	Christensenellaceae	Christensenellaceae R-7 group
23	Enriched	ASV_567	ASV_567 Delftia	4.98453	1.32809	3.25073e-05	TRUE	Bacteria	Proteobacteria	Gammaproteobacteria	Burkholderiales	Comamonadaceae	Delftia
24	Enriched	ASV_1666	ASV_1666 Endozoicomonas	5.37548	1.21641	5.19871e-06	TRUE	Bacteria	Proteobacteria	Gammaproteobacteria	Pseudomonadales	Endozoicomonadaceae	Endozoicomonas
25	Enriched	ASV_2781	ASV_2781 Endozoicomonas	5.03911	0.98747	2.77419e-05	TRUE	Bacteria	Proteobacteria	Gammaproteobacteria	Pseudomonadales	Endozoicomonadaceae	Endozoicomonas
26	Enriched	ASV_2870	ASV_2870 Endozoicomonas	5.01118	0.933642	3.11956e-05	TRUE	Bacteria	Proteobacteria	Gammaproteobacteria	Pseudomonadales	Endozoicomonadaceae	Endozoicomonas
27	Enriched	ASV_2179	ASV_2179 Endozoicomonas	4.93946	1.07876	3.91887e-05	TRUE	Bacteria	Proteobacteria	Gammaproteobacteria	Pseudomonadales	Endozoicomonadaceae	Endozoicomonas
28	Enriched	ASV_634	ASV_634 FD2005	5.15991	1.92364	1.5782e-05	TRUE	Bacteria	Firmicutes	Clostridia	Lachnospirales	Lachnospiraceae	FD2005
29	Enriched	ASV_1565	ASV_1565 MND1	4.75961	1.53056	8.65956e-05	TRUE	Bacteria	Proteobacteria	Gammaproteobacteria	Burkholderiales	Nitrosomonadaceae	MND1
30	Enriched	ASV_2683	ASV_2683 Nitrospira	5.44791	1.48027	3.64845e-06	TRUE	Bacteria	Nitrospirota	Nitrospiria	Nitrospirales	Nitrospiraceae	Nitrospira
31	Enriched	ASV_3443	ASV_3443 Pedomicrobium	4.94728	1.37444	3.81061e-05	TRUE	Bacteria	Proteobacteria	Alphaproteobacteria	Rhizobiales	Hyphomicrobiaceae	Pedomicrobium
32	Enriched	ASV_1155	ASV_1155 Pseudobutyrivibrio	5.72906	1.82642	1.04824e-06	TRUE	Bacteria	Firmicutes	Clostridia	Lachnospirales	Lachnospiraceae	Pseudobutyrivibrio
33	Enriched	ASV_2342	ASV_2342 Rikenellaceae RC9 gut group	5.22027	1.51084	1.1591e-05	TRUE	Bacteria	Bacteroidota	Bacteroidia	Bacteroidales	Rikenellaceae	Rikenellaceae RC9 gut group
34	Enriched	ASV_1211	ASV_1211 Saccharofermentans	5.27823	1.66503	8.59643e-06	TRUE	Bacteria	Firmicutes	Clostridia	Oscillospirales	Hungateiclostridiaceae	Saccharofermentans
35	Enriched	ASV_208	ASV_208 Salinarimonas	6.27239	2.62356	7.0297e-08	TRUE	Bacteria	Proteobacteria	Alphaproteobacteria	Rhizobiales	Beijerinckiaceae	Salinarimonas
36	Enriched	ASV_4183	ASV_4183 Simkania	6.16684	1.13945	1.2577e-07	TRUE	Bacteria	Verrucomicrobiota	Chlamydiae	Chlamydiales	Simkaniaceae	Simkania
37	Enriched	ASV_2431	ASV_2431 Unclassified	5.75395	1.38485	9.28132e-07	TRUE	Bacteria	Proteobacteria	Alphaproteobacteria	Azospirillales	Unclassified	Unclassified
38	Enriched	ASV_3886	ASV_3886 Unclassified	5.40724	1.329	4.50405e-06	TRUE	Bacteria	Proteobacteria	Gammaproteobacteria	PLTA13	Unclassified	Unclassified
39	Enriched	ASV_1840	ASV_1840 Unclassified	4.86896	1.58247	5.29327e-05	TRUE	Bacteria	Bacteroidota	Bacteroidia	Bacteroidales	F082	Unclassified
40	Enriched	ASV_1089	ASV_1089 Unclassified	4.76844	1.77333	8.37878e-05	TRUE	Bacteria	NB1-j	Unclassified	Unclassified	Unclassified	Unclassified

## Sheet: Table S4
Table S4. Details of the linear mixed effects model analysis for the effect of treatment on the change in Fv/Fm monitored at different sampling times. The results of the model selection procedure on the fixed effect terms are given and the most parsimonious model is highlighted in bold. Analyses reveal that treatment was not significant in the analysis. The degrees of freedom (d.f.), AIC, BIC, lo…
Model selection								AIC	BIC	logLik	deviance	Chisq	Df	Pr(>Chisq)
model_3: PAM ~ Time + 1 + (1 | Treatment/Replicate)							model_3	-488.856	-469.344	251.428	-502.856
model_2: PAM ~ Time + Treatment + (1 | Treatment/Replicate)							model_2	-486.86	-464.56	251.43	-502.86	0.00421014	1	0.948265
model_1: PAM ~ Time * Treatment + (1 | Treatment/Replicate)							model_1	-483.349	-452.687	252.675	-505.349	2.48904	3	0.477276

## Sheet: Table S5
Table S5. Details of the post hoc Tukey test comparing the coral in situ performance at different sampling times.
Sampling time	estimate	SE	df	t.ratio	p.value
T1 - T2	-0.0370667	0.00730063	93.1396	-5.07718	<.0001
T1 - T3	-0.0835333	0.00730063	93.1396	-11.4419	<.0001
T1 - T4	-0.0116667	0.00730063	93.1396	-1.59804	0.38
T2 - T3	-0.0464667	0.00730063	93.1396	-6.36474	<.0001
T2 - T4	0.0254	0.00730063	93.1396	3.47915	0.0042
T3 - T4	0.0718667	0.00730063	93.1396	9.84389	<.00010

## Sheet: Table S6
Table S6. Details of the post hoc Tukey test comparing the coral thermal threshold (ED50) at different sampling times.
Sampling Time	estimate	SE	df	t.ratio	p.value
T1 - T2	1.47925	0.208432	93.1034	7.09701	<.0001
T1 - T3	1.70046	0.208432	93.1034	8.15833	<.0001
T1 - T4	2.58224	0.208432	93.1034	12.3888	<.0001
T2 - T3	0.221214	0.208432	93.1034	1.06132	0.71
T2 - T4	1.10299	0.208432	93.1034	5.29183	<.0001
T3 - T4	0.881775	0.208432	93.1034	4.23051	<.0001

## Sheet: Table S7
Table S7. Details of the linear mixed effects model analysis for the effect of treatment on the change in the thermal threshold of P. verrucosa (ED50) monitored at different sampling times. The results of the model selection procedure on the fixed effect terms are given and the most parsimonious model is highlighted in bold. Analyses reveal that treatment was not significant in the analysis. The …
Model selection							AIC	BIC	logLik	deviance	Chisq	Df	Pr(>Chisq)
model_3: ED50 ~ SamplingTimes + 1 + (1 | Site/Replicate)						model_3	310.566	330.079	-148.283	296.566
model_2: ED50 ~ SamplingTimes + Site + (1 | Site/Replicate)						model_2	312.508	334.808	-148.254	296.508	0.0580018	1	0.809682
model_1: ED50 ~ SamplingTimes * Site + (1 | Site/Replicate)						model_1	317.861	348.524	-147.931	295.861	0.64702	3	0.885589

## Sheet: Table S8
Table S8. In-situ physicochemical parameters according to sampling time. Daily mean, minimum (Min), and maximum (Max) seawater temperature, daily mean salinity and average nutrient (Silica, Nitrite, Nitrate, Phosphate and Dissolved Organic Carbon (DOC) concentration are given. Nutrient values were measured in T1 and T3 only.
Sampling time	date	Water temperature (Min – Max)(°C)	Salinity (PSU)	Silica (µg/l)	Nitrite (µg/l)	Nitrate (µg/l)	Phosphate (µg/l)	DOC (µM/l)
T1	2021-08-24	31.97 (31.64 – 32.39)	39.01	43.21 ± 3.00	6.81 ± 1.80	45.83 ± 30.72	8.84 ± 6.02	126.14 ± 14.88
T2	2021-10-06	29.84 (29.58 – 30.18)	39.14	N/A	N/A	N/A	N/A	N/A
T3	2021-11-23	28.72 (28.54 – 29.01)	38.81	58.17 ± 1.02	16.10 ± 0.69	123.22 ± 82.22	8.15 ± 1.07	171.87 ± 10.58
T4	2022-04-18	28.01 (27.69 – 28.28)	38.91	N/A	N/A	N/A	N/A	N/A

## Sheet: Table S9
Table S9. Temperature profiles and time settings of CBASS experiments.
						30°C profile
30°C
18 hrs
						33°C profile
	+ 0.6°C								- 0.7°C
						33°C
					33°C	180 mins			32.3°C
				32.4°C	20 mins				15 mins
			31.8°C	40 mins						31.6°C
			40 mins							15 mins
		31.2°C									30.9°C
		40 mins									15 mins
	30.6°C											30.2°C
	40 mins											15 mins
30°C													30°C
30 mins													660 mins
						36°C profile
	+ 1.2°C								- 1.5°C
						36°C
					36°C	180 mins			34.5°C
				34.8°C	20 mins				15 mins
			33.6°C	40 mins						33°C
			40 mins							15 mins
		32.4°C									31.5°C
		40 mins									15 mins
	31.2°C											30°C
	40 mins											15 mins
30°C													30°C
30 mins													660 mins
						39°C profile
	+ 1.8°C								- 2.2°C
						39°C
					39°C	180 mins			36.8°C
				37.2°C	20 mins				15 mins
			35.4°C	40 mins						34.6°C
			40 mins							15 mins
		33.6°C									32.4°C
		40 mins									15 mins
	31.8°C											30.2°C
	40 mins											15 mins
30°C													30°C
30 mins													660 mins
Acclimatization	Ramping					Heat hold			Cool down				Recovery
30 mins	3 hrs					3 hrs			1 hrs				11 hrs
